# Supplementary material for: Discriminative Identification of SARS-CoV-2 Variants Based on Mass-Spectrometry Analysis
Source: MDPI journal article supplement (doi:10.3390/biomedicines11092373), 2023-08-24
Supplement: s1 [file s1]

Table S3: Unique markers for SARS-Cov-2 variants identified by High resolution LC-MS/MS (Orbitrap)

| variant                | Unique Markers                  | Parent ions                                  | r.t | MS-MS fragments                                                                                                                                                                                                                                                                                                                                                                                                                                                                                                                                                                                                                                                                                                                                                                                                                                                                                                                                                                                                                                                                                                                                                                                                                                                                                                           |
|------------------------|---------------------------------|----------------------------------------------|-----|---------------------------------------------------------------------------------------------------------------------------------------------------------------------------------------------------------------------------------------------------------------------------------------------------------------------------------------------------------------------------------------------------------------------------------------------------------------------------------------------------------------------------------------------------------------------------------------------------------------------------------------------------------------------------------------------------------------------------------------------------------------------------------------------------------------------------------------------------------------------------------------------------------------------------------------------------------------------------------------------------------------------------------------------------------------------------------------------------------------------------------------------------------------------------------------------------------------------------------------------------------------------------------------------------------------------------|
| Alpha<br>(UK)          | VCEFAQCNDPFLGVYHK<br>(P1-Spike) | 682.6469<br>(M+3H)/3                         | 6.5 | 284.172 (y <sub>2</sub> ) <sup>+1</sup> , 447.236 (y <sub>3</sub> ) <sup>+1</sup> , 546.304 (y <sub>4</sub> ) <sup>+1</sup> , 603.325 (y <sub>5</sub> ) <sup>+1</sup> , 716.409 (y <sub>6</sub> ) <sup>+1</sup> , 863.478 (y <sub>7</sub> ) <sup>+1</sup> , 960.531 (y <sub>8</sub> ) <sup>+1</sup> , 302.167 (y <sub>5</sub> ) <sup>+2</sup> , 358.709 (y <sub>6</sub> ) <sup>+2</sup> , 432.243 (y <sub>7</sub> ) <sup>+2</sup> , 480.769 (y <sub>8</sub> ) <sup>+2</sup>                                                                                                                                                                                                                                                                                                                                                                                                                                                                                                                                                                                                                                                                                                                                                                                                                                               |
|                        | IFTIGTVTFK<br>(P9-Orf3a)        | 563.8295<br>(M+2H)/2                         | 6.5 | 86.097 (imm of Ile), 120.081 (imm of Phe), 147.172 (y <sub>1</sub> ) <sup>+1</sup> , 294.182 (y <sub>2</sub> ) <sup>+1</sup> , 652.367 (y <sub>6</sub> ) <sup>+1</sup> , 765.451 (y <sub>7</sub> ) <sup>+1</sup> , 866.499 (y <sub>8</sub> ) <sup>+1</sup> , 1013.567 (y <sub>9</sub> ) <sup>+1</sup> , 995.557 (y <sub>9</sub> – H <sub>2</sub> O) <sup>+1</sup> , 261.160 (b <sub>2</sub> ) <sup>+1</sup> , 362.208 (b <sub>3</sub> ) <sup>+1</sup> , 507.288 (y <sub>9</sub> ) <sup>+2</sup>                                                                                                                                                                                                                                                                                                                                                                                                                                                                                                                                                                                                                                                                                                                                                                                                                           |
| Beta<br>(South Africa) | GISPAR<br>(P1-N)                | 600.3469<br>(M+H)<br>300.6773<br>(M+2H)/2    | 3.2 | 430.241(y <sub>4</sub> ) <sup>+1</sup> , 343.209 (y <sub>3</sub> ) <sup>+1</sup> , 246.157 (y <sub>2</sub> ) <sup>+1</sup> , 175.119 (y <sub>1</sub> ) <sup>+1</sup> , 413.215 (z <sub>4</sub> ) <sup>+1</sup> , 326.183 (z <sub>3</sub> ) <sup>+1</sup> , 412.231 (y <sub>4</sub> -H <sub>2</sub> O) <sup>+1</sup> , 325.199 (y <sub>3</sub> -H <sub>2</sub> O) <sup>+1</sup> , 413.215 (y <sub>4</sub> -NH <sub>3</sub> ) <sup>+1</sup> , 395.204 (Z <sub>4</sub> -H <sub>2</sub> O) <sup>+1</sup> , 171.113 (b <sub>2</sub> ), 258.145 (b <sub>3</sub> ), 355.198 (b <sub>4</sub> ), 143.118 (a <sub>4</sub> ), 240.135 (b <sub>3</sub> -H <sub>2</sub> O) <sup>+</sup> , 355.198 (c <sub>3</sub> - NH <sub>3</sub> ) <sup>+</sup> , 272.167 (y <sub>5</sub> ) <sup>+2</sup> , 215.625 (y <sub>4</sub> ) <sup>+2</sup> , 172.109 (y <sub>3</sub> ) <sup>+2</sup> , 86.097 (Imm of Ile), 60.045 (Imm of Ser)                                                                                                                                                                                                                                                                                                                                                                                                            |
|                        | QIAPGQTGNIAQYNYK<br>(P5-Spike)  | 876.9317<br>(M+2H)/2                         | 4.8 | 1511.558 (y <sub>14</sub> ) <sup>+1</sup> , 1440.676 (y <sub>13</sub> ) <sup>+1</sup> , 1158.543 (y <sub>10</sub> ) <sup>+1</sup> , 1057.495 (y <sub>9</sub> ) <sup>+1</sup> , 773.347 (y <sub>6</sub> ) <sup>+1</sup> , 702.310 (y <sub>5</sub> ) <sup>+1</sup> , 587.283 (y <sub>4</sub> ) <sup>+1</sup> , 424.283 (y <sub>4</sub> ) <sup>+1</sup> , 129.066 (b <sub>1</sub> ) <sup>+1</sup> , 242.150 (b <sub>2</sub> ) <sup>+1</sup> , 313.188 (b <sub>3</sub> ) <sup>+1</sup> , 756.360 (y <sub>14</sub> ) <sup>+2</sup> , 720.842 (y <sub>13</sub> ) <sup>+2</sup>                                                                                                                                                                                                                                                                                                                                                                                                                                                                                                                                                                                                                                                                                                                                                  |
| Delta<br>(India)       | AYETQALPQK<br>P13(N)            | 574.8014<br>(M+2H)/2                         | 4.0 | 1077.558 (y <sub>9</sub> ) <sup>+1</sup> , 914.495 (y <sub>8</sub> ) <sup>+1</sup> , 785.452 (y <sub>7</sub> ) <sup>+1</sup> , 684.404 (y <sub>6</sub> ) <sup>+1</sup> , 556.346 (y <sub>5</sub> ) <sup>+1</sup> , 485.309 (y <sub>4</sub> ) <sup>+1</sup> , 372.225 (y <sub>3</sub> ) <sup>+1</sup> , 275.172 (y <sub>2</sub> ) <sup>+1</sup> , 147.113 (y <sub>1</sub> ) <sup>+1</sup> , 235.108 (b <sub>2</sub> -H <sub>2</sub> O) <sup>+1</sup> , 207.113 (a <sub>2</sub> ) <sup>+1</sup> , 759.368 (b <sub>7</sub> -H <sub>2</sub> O) <sup>+</sup> , 646.284 (b <sub>6</sub> -H <sub>2</sub> O) <sup>+1</sup> , 575.247 (b <sub>5</sub> -H <sub>2</sub> O) <sup>+1</sup> , 447.188 (b <sub>4</sub> -H <sub>2</sub> O) <sup>+1</sup> , 136.076 (Imm of Tyr), 984.479 (b <sub>9</sub> ) <sup>+1</sup> , 777.378 (b <sub>7</sub> ) <sup>+1</sup> , 749.383 (a <sub>7</sub> ) <sup>+1</sup> , 732.357 (a <sub>7</sub> -NH <sub>3</sub> ) <sup>+1</sup> , 667.378 (Z <sub>6</sub> ), 593.257 (b <sub>5</sub> ) <sup>+1</sup> , 539.283 (y <sub>9</sub> ) <sup>+2</sup> , 530.278 (y <sub>9</sub> -H <sub>2</sub> O) <sup>+2</sup> , 393.230 (y <sub>7</sub> ) <sup>+2</sup> , 465.198 (b <sub>4</sub> ) <sup>+1</sup> , 457.751 (y <sub>8</sub> ) <sup>+2</sup> , 420.177 (a <sub>4</sub> -NH <sub>3</sub> ) <sup>+</sup> |
|                        | LQNVVNQNAQALNTLVK<br>P8 (Spike) | 934.0239<br>(M+2H)/2<br>623.0185<br>(M+3H)/3 | 5.9 | 1412.786 (y <sub>13</sub> ) <sup>+1</sup> , 1313.718 (y <sub>12</sub> ) <sup>+1</sup> , 1071.616 (y <sub>10</sub> ) <sup>+1</sup> , 957.573 (y <sub>9</sub> ) <sup>+1</sup> , 886.536 (y <sub>8</sub> ) <sup>+1</sup> , 758.478 (y <sub>7</sub> ) <sup>+1</sup> , 574.356 (y <sub>5</sub> ) <sup>+1</sup> , 460.314 (y <sub>4</sub> ) <sup>+1</sup> , 706.897 (y <sub>13</sub> ) <sup>+2</sup> , 443.772 (y <sub>8</sub> ) <sup>+2</sup> , 242.150 (b <sub>2</sub> ) <sup>+1</sup> , 356.193 (b <sub>3</sub> ) <sup>+1</sup> , 455.262 (b <sub>4</sub> ) <sup>+1</sup> , 554.330 (b <sub>5</sub> ) <sup>+1</sup> , 796.432 (b <sub>7</sub> ) <sup>+1</sup> , 981.512 (b <sub>9</sub> ) <sup>+1</sup> , 228.135 (b <sub>4</sub> ) <sup>+2</sup> , 277.669 (b <sub>5</sub> ) <sup>+2</sup> , 344.690 (b <sub>6</sub> ) <sup>+2</sup> , 398.720 (b <sub>7</sub> ) <sup>+2</sup> , 455.741 (b <sub>8</sub> ) <sup>+2</sup> , 491.260 (b <sub>9</sub> ) <sup>+2</sup> , 555.289 (b <sub>10</sub> ) <sup>+2</sup>                                                                                                                                                                                                                                                                                                               |
|                        | NSTPGSSMGTSPPAR<br>P12 (N)      | 675.3098<br>(M+2H)/2                         | 3.7 | 1148.537 (y <sub>12</sub> ) <sup>+1</sup> , 1047.489 (y <sub>11</sub> ) <sup>+1</sup> , 950.437 (y <sub>10</sub> ) <sup>+1</sup> , 863.415 (y <sub>9</sub> ) <sup>+1</sup> , 806.383 (y <sub>8</sub> ) <sup>+1</sup> , 719.351 (y <sub>7</sub> ) <sup>+1</sup> , 588.311 (y <sub>6</sub> ) <sup>+1</sup> , 430.241 (y <sub>4</sub> ) <sup>+1</sup> , 343.209 (y <sub>3</sub> ) <sup>+1</sup> , 175.120 (y <sub>1</sub> ) <sup>+1</sup> , 618.288 (y <sub>13</sub> ) <sup>+2</sup> , 574.772 (y <sub>12</sub> ) <sup>+2</sup> , 524.249 (y <sub>11</sub> ) <sup>+2</sup> , 202.083 (b <sub>2</sub> ) <sup>+1</sup> , 303.130 (b <sub>3</sub> ) <sup>+1</sup>                                                                                                                                                                                                                                                                                                                                                                                                                                                                                                                                                                                                                                                               |
|                        | VGGNYNYR<br>P7 (Spike)          | 471.7255<br>(M+2H)/2                         | 3.6 | 843.375 (y <sub>7</sub> ) <sup>+1</sup> , 786.353 (y <sub>6</sub> ) <sup>+1</sup> , 729.332 (y <sub>5</sub> ) <sup>+1</sup> , 615.289 (y <sub>4</sub> ) <sup>+1</sup> , 452.226 (y <sub>3</sub> ) <sup>+1</sup> , 338.183 (y <sub>2</sub> ) <sup>+1</sup> , 175.120 (y <sub>1</sub> ) <sup>+1</sup> , 422.191 (y <sub>7</sub> ) <sup>+2</sup> , 393.681 (y <sub>6</sub> ) <sup>+2</sup> , 157.098 (b <sub>2</sub> ) <sup>+1</sup> , 72.081 (Imm of Val), 136.076 (Imm of Tyr)                                                                                                                                                                                                                                                                                                                                                                                                                                                                                                                                                                                                                                                                                                                                                                                                                                             |
| Gamma<br>(Brazil)      | GQGVPIINTSSR<br>(P14-N)         | 615.3158<br>(M+2H)/2                         | 3.9 | 186.088 (b <sub>2</sub> ) <sup>+1</sup> , 169.061 (b <sub>2</sub> -NH <sub>3</sub> ), 243.109 (b <sub>3</sub> ) <sup>+1</sup> , 314.1778 (a <sub>4</sub> ) <sup>+1</sup> , 342.178(b <sub>4</sub> ) <sup>+1</sup> , 296.172 (a <sub>4</sub> -H <sub>2</sub> O), 411.236(a <sub>5</sub> ) <sup>+1</sup> , 888.454(y <sub>8</sub> ) <sup>+1</sup> , 871.427 (z <sub>8</sub> ) <sup>+1</sup> , 791.401(y <sub>7</sub> ) <sup>+1</sup> , 678.317(y <sub>6</sub> ) <sup>+1</sup> , 494.265(y <sub>9</sub> ) <sup>+2</sup> , 444.731(y <sub>8</sub> ) <sup>+2</sup>                                                                                                                                                                                                                                                                                                                                                                                                                                                                                                                                                                                                                                                                                                                                                             |
|                        | QIAPGQTGTIADYNYK<br>(P8-Spike)  | 870.4341<br>(M+2H)/2                         | 4.8 | 1498.718(y <sub>14</sub> ) <sup>+1</sup> , 1427.681(y <sub>13</sub> ) <sup>+1</sup> , 1330.628(y <sub>12</sub> ) <sup>+1</sup> , 1145.548(y <sub>10</sub> ) <sup>+1</sup> , 1044.500(y <sub>9</sub> ) <sup>+1</sup> , 987.479(y <sub>8</sub> ) <sup>+1</sup> , 886.431(y <sub>7</sub> ) <sup>+1</sup> , 773.347(y <sub>6</sub> ) <sup>+1</sup> , 702.310(y <sub>5</sub> ) <sup>+1</sup> , 587.283(y <sub>4</sub> ) <sup>+1</sup> , 424.220(y <sub>3</sub> ) <sup>+1</sup> , 310.177(y <sub>2</sub> ) <sup>+1</sup> , 147.113(y <sub>1</sub> ) <sup>+1</sup> , 242.150(b <sub>2</sub> ) <sup>+1</sup> , 313.188(b <sub>3</sub> ) <sup>+1</sup> , 595.320(b <sub>6</sub> ) <sup>+1</sup> , 967.521(b <sub>10</sub> ) <sup>+1</sup> , 749.863(y <sub>14</sub> ) <sup>+2</sup> , 714.344(y <sub>13</sub> ) <sup>+2</sup> , 136.076 (Imm of Tyr)                                                                                                                                                                                                                                                                                                                                                                                                                                                                               |
|                        | ASANLAAIK<br>(P12-Spike)        | 429.7563<br>(M+2H)/2                         | 4.1 | 787.468(y <sub>8</sub> ) <sup>+1</sup> , 700.436(y <sub>7</sub> ) <sup>+1</sup> , 629.399(y <sub>6</sub> ) <sup>+1</sup> , 515.356(y <sub>5</sub> ) <sup>+1</sup> , 402.272(y <sub>4</sub> ) <sup>+1</sup> , 331.234(y <sub>3</sub> ) <sup>+1</sup> , 260.197(y <sub>2</sub> ) <sup>+1</sup> , 147.113(y <sub>1</sub> ) <sup>+1</sup> , 159.077(b <sub>2</sub> ) <sup>+1</sup> , 344.157(b <sub>4</sub> ) <sup>+1</sup> , 457.241(b <sub>5</sub> ) <sup>+1</sup> , 212.103(b <sub>3</sub> -H <sub>2</sub> O) <sup>+1</sup> , 555.325(a <sub>7</sub> -H <sub>2</sub> O) <sup>+1</sup> , 394.238(y <sub>8</sub> ) <sup>+2</sup> , 350.722(y <sub>7</sub> ) <sup>+2</sup> , 86.097 (Imm of Leu), 60.045 (Imm of Ser)                                                                                                                                                                                                                                                                                                                                                                                                                                                                                                                                                                                                         |
|                        | TQLPSAYTNSFTR<br>(P5-Spike)     | 743.3707                                     | 5.0 | 1256.627(y <sub>11</sub> ) <sup>+1</sup> , 1143.543(y <sub>10</sub> ) <sup>+1</sup> , 959.459(y <sub>8</sub> ) <sup>+1</sup> , 725.358(y <sub>8</sub> ) <sup>+1</sup> , 175.119(y <sub>1</sub> ) <sup>+1</sup> , 628.818(y <sub>11</sub> ) <sup>+2</sup> , 572.276(y <sub>10</sub> ) <sup>+2</sup> , 230.114(b <sub>2</sub> ) <sup>+1</sup> , 343.198(b <sub>3</sub> ) <sup>+1</sup> , 136.076 (Imm of Tyr), 129.114(Imm of Arg)                                                                                                                                                                                                                                                                                                                                                                                                                                                                                                                                                                                                                                                                                                                                                                                                                                                                                          |
