# Supplementary material for: Discriminative Identification of SARS-CoV-2 Variants Based on Mass-Spectrometry Analysis
Source: MDPI journal article supplement (doi:10.3390/biomedicines11092373), 2023-08-24
Supplement: s1 [file s1]

**Table S1: List of mutations with regard to the Wuhan reference strain**

|                      | UK                  | SA                 | BR                 | IN          |
|----------------------|---------------------|--------------------|--------------------|-------------|
| <b><u>Orf1ab</u></b> | T1001I              | T265I              | S1188L             | P314L       |
|                      | A1708D              | P1220L             | K1795Q             | G662S       |
|                      | I2230T              | K1655N             | S2553F             | P1000L      |
|                      | F2780L              | K3353R             | del3675-3677 (SGF) | H2285Y      |
|                      | del 3675-3677 (SGF) | del3675-3677 (SGF) | L3829F             |             |
|                      | L3829F              | L3829F             | E5665D             |             |
|                      | P4715L              | P4715L             |                    |             |
|                      |                     |                    |                    |             |
| <b><u>Spike</u></b>  | del69-70 (HV)       | L18F               | L18F               | T19R        |
|                      | del144(Y)           | D80A               | T20N               | G142D       |
|                      | N501Y               | D215G              | P26S               | del 157/158 |
|                      | A570D               | del241-243* (LLA)  | D138Y              | L452R       |
|                      | P681H               | K417N              | R190S              | T478K       |
|                      | T716I               | E484K              | K417T              | D614G       |
|                      | S982A               | N501Y              | E484K              | P681R       |
|                      | D1118H              | R682L              | N501Y              | R682W       |
|                      |                     | A701V              | H655Y              | D950N       |
|                      |                     |                    | T1027I             |             |
|                      |                     |                    | V1176F             |             |
|                      |                     |                    |                    |             |
|                      |                     |                    |                    |             |
| <b><u>Orf3a</u></b>  |                     | Q57H               |                    | S26L        |
|                      |                     | S171L              |                    |             |
|                      |                     |                    |                    |             |
| <b><u>E</u></b>      |                     | P71L               |                    |             |
|                      |                     |                    |                    |             |
| <b><u>M</u></b>      |                     |                    |                    | I82T        |
|                      |                     |                    |                    |             |
| <b><u>Orf7a</u></b>  |                     |                    |                    | V82A        |
|                      |                     |                    |                    | L116F       |
|                      |                     |                    |                    | T120I       |
|                      |                     |                    |                    |             |
| <b><u>Orf8</u></b>   | Q27 stop            |                    | E92K               | del119/120  |
|                      | R52I                |                    | Ins28269-28273     |             |
|                      | Y73C                |                    |                    |             |
|                      |                     |                    |                    |             |
| <b><u>N</u></b>      | D3L                 | T205I              | P80R               | D63G        |
|                      | 203-204 (RG>KR)     |                    | 203-204 (RG>KR)    | R203M       |
|                      | S235F               |                    |                    | D377Y       |
|                      |                     |                    |                    | R385K       |
